# Supplementary material for: Typhonium giganteum Lectin Exerts A Pro-Inflammatory Effect on RAW 264.7 via ROS and The NF-κB Signaling Pathway
Source: MDPI journal article supplement (doi:10.3390/toxins9090275), 2017-09-07
Supplement: s1 [file s1]

# Supplementary Materials: *Typhonium giganteum* Lectin Exerts A Pro-Inflammatory Effect on RAW 264.7 via ROS and The NF-κB Signaling Pathway

Wei Wang, Hao Wu, Hongli Yu, Xingde Zhang, Guojing Cui, Kuilong Wang, Shanhu Mao and Yaozong Pan

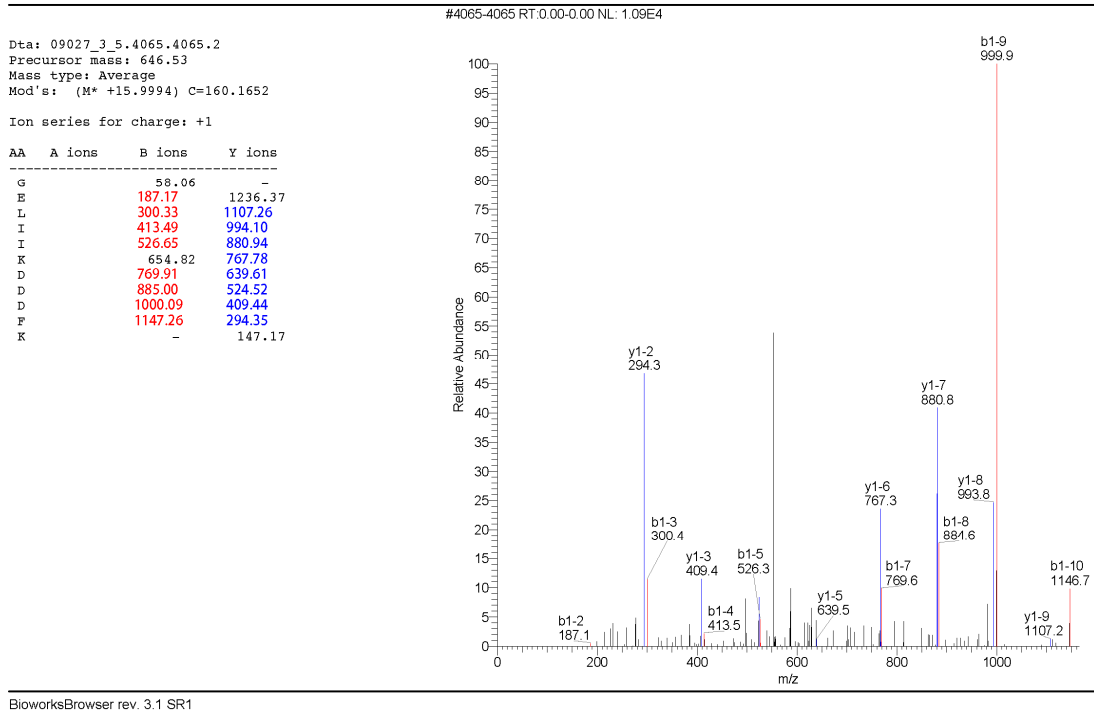

Figure S1. MS/MS analysis of 'GELIIKDDDFK' from TGL.

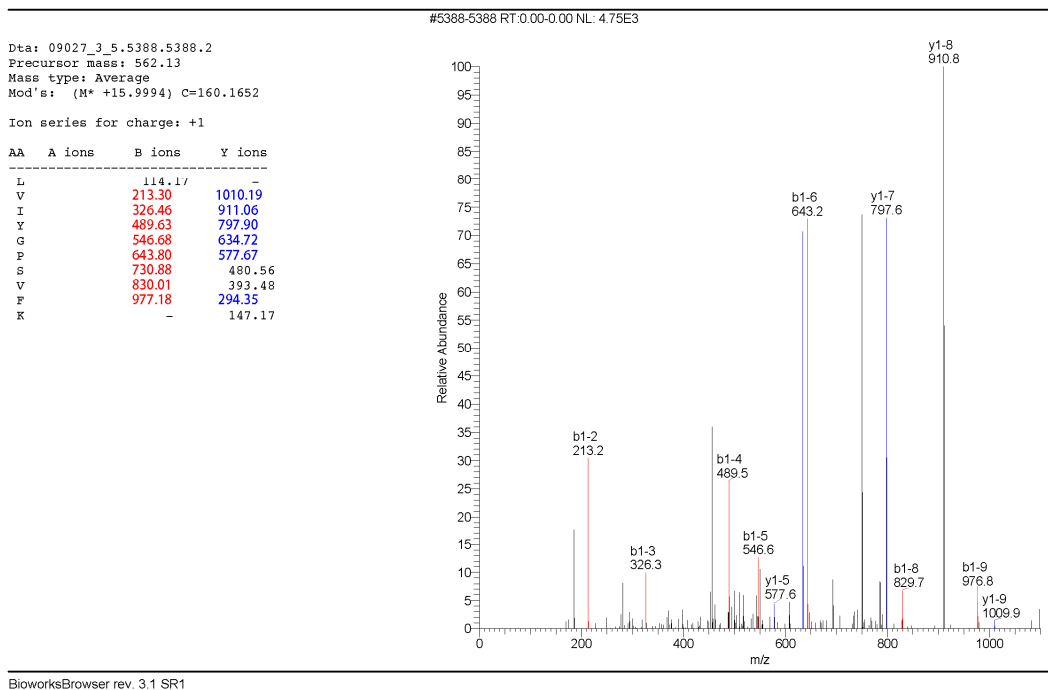

Figure S2. MS/MS analysis of 'LVIYGPSVFK' from TGL.
